# Supplementary material
Source: publisher figshare collection journal article supplement (https://sage.figshare.com/ndownloader/files/31572634)
Supplement: Supplementary file 1 [file 31572634]

# Plasma neurofilament light chain protein is not increased in treatment-resistant schizophrenia and first-degree relatives

## SUPPLEMENTARY MATERIAL

| Control percentile <sup>a,b</sup>  | TRS (n=82) | P-value (TRS vs C) <sup>c</sup> | NON-CLOZ (n=13) | P-value (NON-CLOZ vs C) <sup>c</sup> | Siblings (n=21) | P-value (siblings vs C) <sup>c</sup> |
|------------------------------------|------------|---------------------------------|-----------------|--------------------------------------|-----------------|--------------------------------------|
| 80 <sup>th</sup> percentile, n (%) | 22 (27%)   | 0.223                           | 1 (8%)          | 0.676                                | 8 (38%)         | 0.07                                 |
| 90 <sup>th</sup> percentile, n (%) | 19 (23%)   | <b><u>0.039</u></b>             | 1 (8%)          | 1.000                                | 8 (38%)         | <b><u>&lt;0.001</u></b>              |
| 95 <sup>th</sup> percentile, n (%) | 8 (10%)    | 0.195                           | 0               | 1.000                                | 3 (14%)         | 0.114                                |
| 98 <sup>th</sup> percentile, n (%) | 3 (4%)     | 0.642                           | 0               | 1.000                                | 0               | 1.000                                |

### **Supplementary Table 1. Additional analyses to explore percentile distributions in different groups.**

Underlined and bold values show  $p < 0.05$ .

a: 80<sup>th</sup> percentile: 7.3pg/mL, 90<sup>th</sup> percentile: 8.0pg/mL, 95<sup>th</sup> percentile: 11.3pg/mL, 98<sup>th</sup> percentile: 13.7pg/mL, 99<sup>th</sup> percentile: N/A

b: excluding extreme outlier in control group

c: Fisher's Exact Test used to compare numbers in each percentile allocation in TRS, NON-CLOZ and siblings, compared to controls.

C: control; NON-CLOZ: non-clozapine treated schizophrenia; TRS: treatment-resistant schizophrenia

| Comparison          | Levene's test           | Student's t-test        | Welch's t-test          | Robust group term  |
|---------------------|-------------------------|-------------------------|-------------------------|--------------------|
| TRS vs control      | <b><u>0.003</u></b>     | 0.43                    | 0.38                    | 0.34 [-0.61, 1.29] |
| NON-CLOZ vs control | 0.53                    | 0.17                    | 0.10                    | 0.79 [-0.16, 1.74] |
| Sibling vs control  | <b><u>0.003</u></b>     | 0.15                    | 0.24                    | 0.56 [-0.73, 1.85] |
| Parent vs control   | <b><u>&lt;0.001</u></b> | <b><u>&lt;0.001</u></b> | <b><u>&lt;0.001</u></b> | 2.33 [-0.21, 4.87] |
| NON-CLOZ vs TRS     | 0.06                    | 0.23                    | 0.04                    | 0.83 [-0.48, 2.15] |

**Supplementary Table 2. Additional sensitivity analyses to determine impact of heterogeneity of variances on group differences.**

Underlined and bold values show  $p < 0.05$ . As described in the text, taken together, these sensitivity analyses suggest that heterogeneity of variances does not explain the lack of statistically significant group differences.

NON-CLOZ: non-clozapine treated schizophrenia; TRS: treatment-resistant schizophrenia

| Confidence Intervals of Spearman's rho in TRS group |                |                                                    |        |
|-----------------------------------------------------|----------------|----------------------------------------------------|--------|
|                                                     | Spearman's rho | 95% Confidence Intervals (2-tailed) <sup>a,b</sup> |        |
|                                                     |                | Lower                                              | Upper  |
| NfLValue - AgeAtSample                              | 0.674*         | 0.531                                              | 0.78   |
| NfLValue - SexFEMALE                                | 0.178          | -0.047                                             | 0.386  |
| NfLValue - Duration of Illness                      | 0.467*         | 0.267                                              | 0.629  |
| NfLValue - PANSSPositiveScale                       | -0.016         | -0.24                                              | 0.209  |
| NfLValue - PANSSNegativeScale                       | -0.06          | -0.281                                             | 0.166  |
| NfLValue - PANSSGeneral                             | 0.108          | -0.12                                              | 0.325  |
| NfLValue - school_years                             | -0.029         | -0.251                                             | 0.197  |
| NfLValue - CurrentSmokerYesNo                       | -0.175         | -0.392                                             | 0.061  |
| NfLValue - Alcohol use disorder                     | -0.199         | -0.404                                             | 0.025  |
| NfLValue - HTN                                      | 0.202          | -0.027                                             | 0.411  |
| NfLValue - Diabetes                                 | 0.115          | -0.117                                             | 0.335  |
| NfLValue - Dyslipidaemia                            | 0.273*         | 0.053                                              | 0.468  |
| NfLValue - BMI_calculated                           | -0.264*        | -0.48                                              | -0.019 |
| NfLValue - weight                                   | -0.316*        | -0.516                                             | -0.082 |
| NfLValue - wasi_iq                                  | 0.139          | -0.096                                             | 0.36   |
| NfLValue - ClozapineLevel                           | 0.258*         | 0.034                                              | 0.457  |
| NfLValue - SOFAS                                    | -0.039         | -0.266                                             | 0.191  |
| NfLValue - head_injury                              | -0.084         | -0.303                                             | 0.143  |
| NfLValue - epil                                     | 0.036          | -0.191                                             | 0.26   |
| NfLValue - NeurologicalDisorderDiagnosis            | -0.037         | -0.259                                             | 0.187  |
| NfLValue - ECT                                      | -0.076         | -0.3                                               | 0.155  |

**Supplementary Table 3. Exploratory analyses of associations between NfL and clinical variables in the treatment-resistant schizophrenia group**

**\*: Statistically significant (Spearman's rho 95% confidence intervals don't include zero)**

BMI: body mass index; ECT: electroconvulsive therapy; GAF: Global Assessment of Functioning scale; NfL: neurofilament light; PANSS: Positive and Negative Syndrome Scale; SOFAS: Social and Occupational Functioning Assessment Scale

**a: Estimation is based on Fisher's r-to-z transformation.**

**b: Estimation of standard error is based on the formula proposed by Fieller, Hartley, and Pearson.**

## Figures

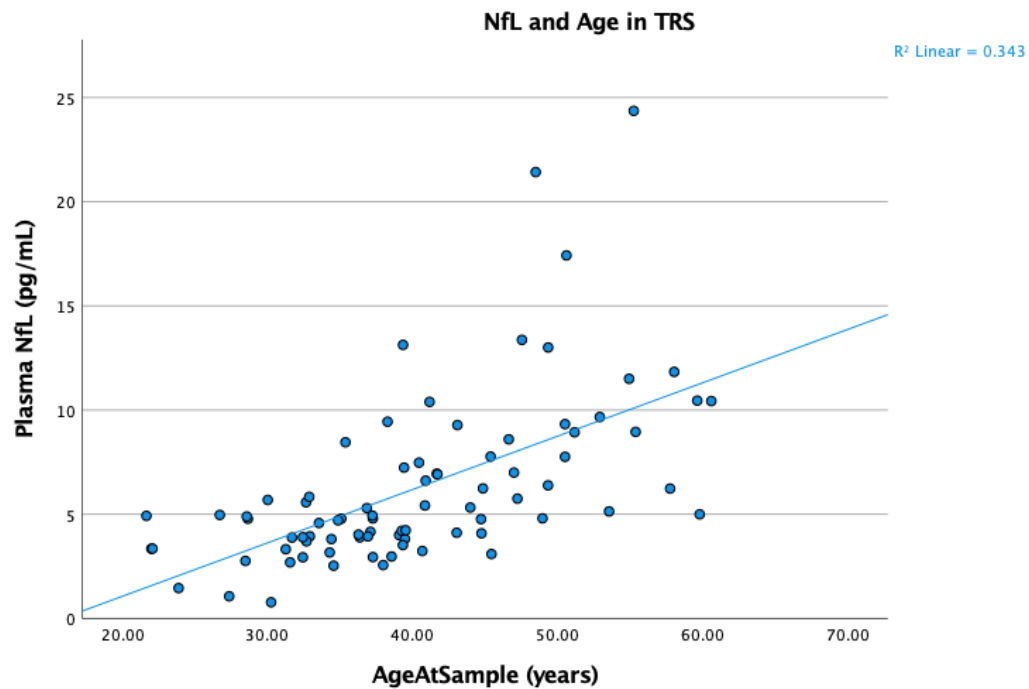

**Supplementary Figure 1. Plasma neurofilament light versus age at blood sample in the treatment-resistant schizophrenia group**

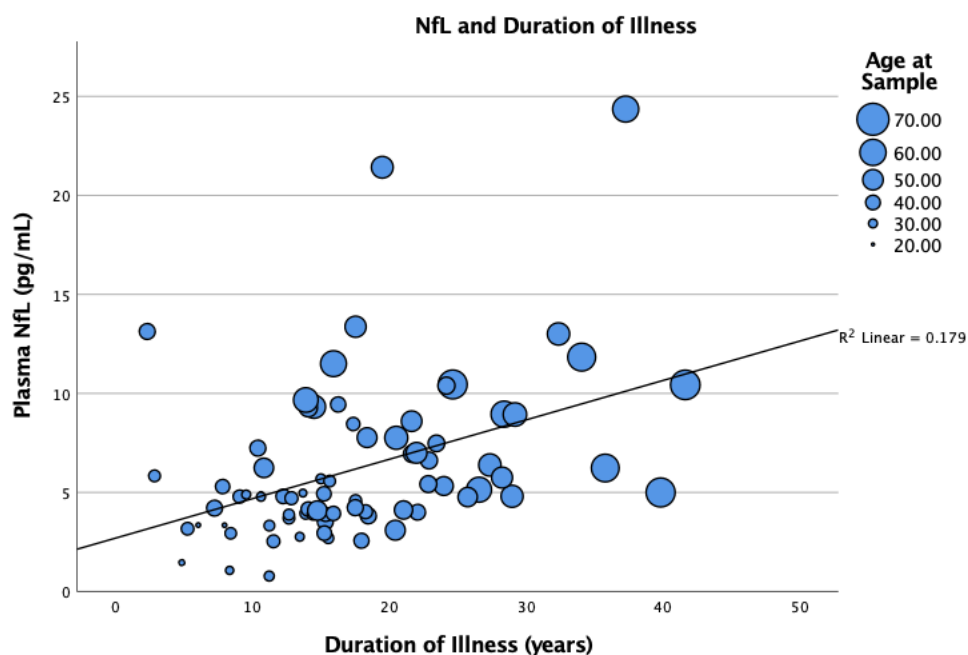

**Supplementary Figure 2. Plasma neurofilament light versus duration of illness in the treatment-resistant schizophrenia group**

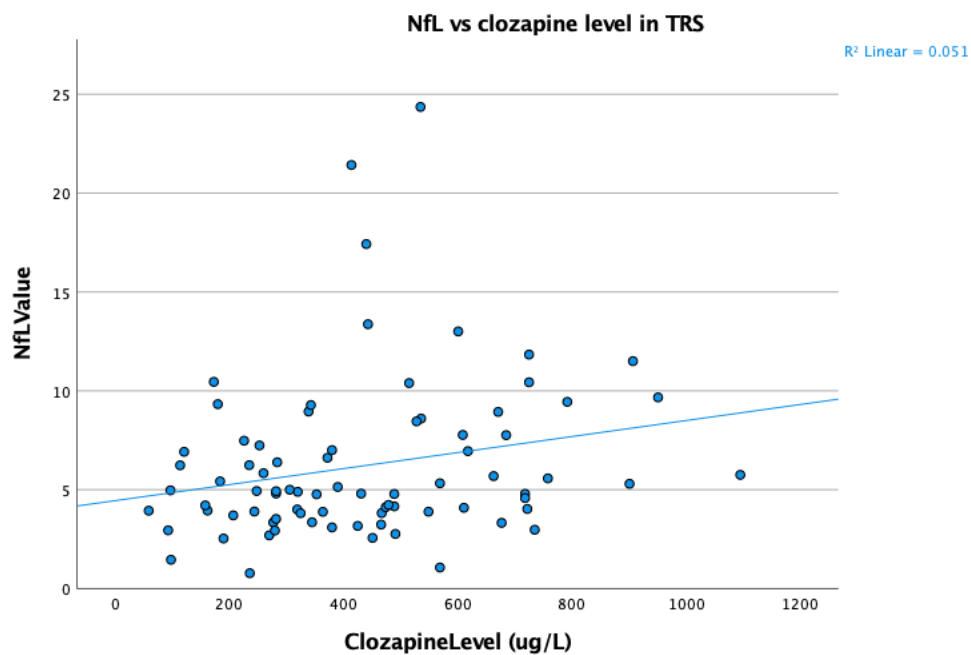

**Supplementary Figure 3. Plasma neurofilament light versus clozapine level in the treatment-resistant schizophrenia group**

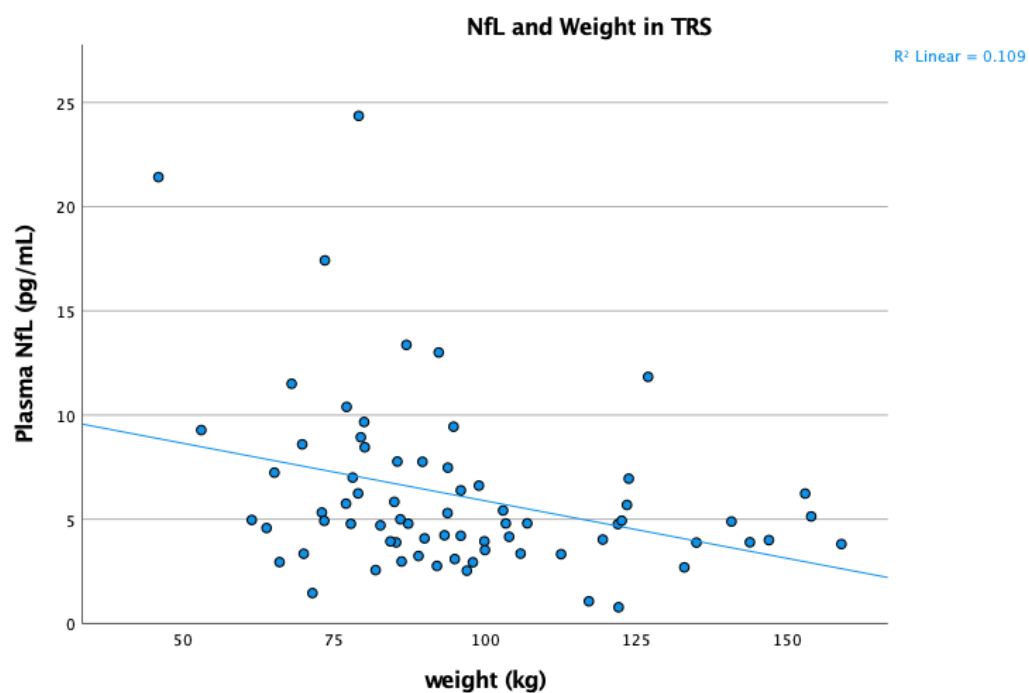

**Supplementary Figure 4. Plasma neurofilament light versus weight in the treatment-resistant schizophrenia group**

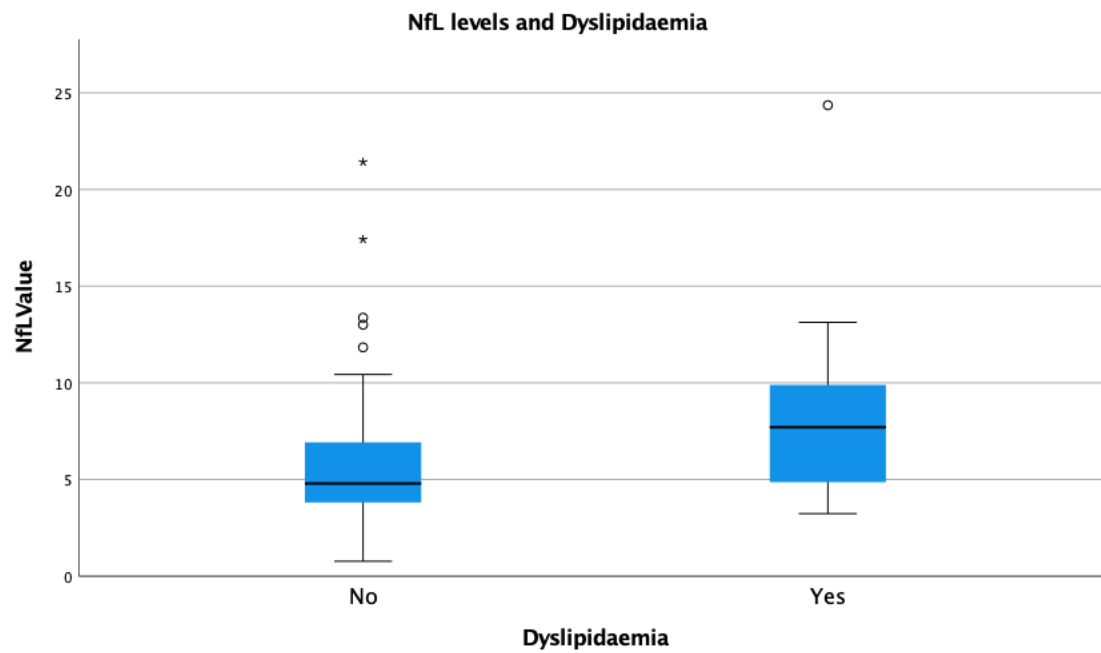

**Supplementary Figure 5. Plasma neurofilament light levels in people with and without dyslipidaemia in the treatment-resistant schizophrenia group**

## APPENDIX 1

### **COLLABORATORS:**

#### **On behalf of others in The MiND Study Group:**

| <b>Name</b>         | <b>Affiliations (separated by semi colon)</b>                                                                                                                                                                                                                                                                       | <b>Title</b> | <b>Highest qualification</b>  |
|---------------------|---------------------------------------------------------------------------------------------------------------------------------------------------------------------------------------------------------------------------------------------------------------------------------------------------------------------|--------------|-------------------------------|
| Qiao-Xin Li         | National Dementia Diagnostics Laboratory, The Florey Institute, University of Melbourne                                                                                                                                                                                                                             | Dr           | PhD                           |
| Christiane Stehmann | Australian National CJD Registry, The Florey Institute, Melbourne                                                                                                                                                                                                                                                   | Dr           | PhD                           |
| Claire Cadwallader  | Neuropsychiatry, Royal Melbourne Hospital; Melbourne; The Turner Institute for Brain and Mental Health, Monash University, Victoria 3800                                                                                                                                                                            | Ms           | BSc(Hons)                     |
| Christopher Fowler  | The Florey Institute of Neuroscience and Mental Health, The University of Melbourne, Parkville, VIC                                                                                                                                                                                                                 | Dr           | PhD                           |
| Parsa Ravanfar      | Melbourne Neuropsychiatry Centre, Department of Psychiatry, The University of Melbourne and Melbourne Health, Carlton South, VIC, Australia                                                                                                                                                                         |              |                               |
| Sarah Farrand       | Neuropsychiatry, Royal Melbourne Hospital; Melbourne Neuropsychiatry Centre & Department of Psychiatry, University of Melbourne                                                                                                                                                                                     | Dr           | FRANZCP, Master of Psychiatry |
| Michael Keem        | Neuropsychiatry, Royal Melbourne Hospital                                                                                                                                                                                                                                                                           | Dr           |                               |
| Matthew Kang        | Neuropsychiatry, Royal Melbourne Hospital; Department of Psychiatry, University of Melbourne                                                                                                                                                                                                                        | Dr           | MBBS MP                       |
| Rosie Watson        | Population Health and Immunity Division, The Walter and Eliza Hall Institute of Medical Research, Parkville, Australia                                                                                                                                                                                              | A/Prof       | PhD                           |
| Nawaf Yassi         | Departments of Medicine and Neurology, Melbourne Brain Centre at the Royal Melbourne Hospital, University of Melbourne, Parkville, Australia<br><br>Population Health and Immunity Division, The Walter and Eliza Hall Institute of Medical Research, Parkville, Australia                                          | A/Prof       | PhD                           |
| Cath Kaylor-Hughes  | Integrated Mental Health Team<br>Dept of General Practice<br>University of Melbourne, 780 Elizabeth St, Melbourne, 3010                                                                                                                                                                                             | Dr.          | DPhil                         |
| Richard Kanaan      | Dept of Psychiatry, University of Melbourne, Austin Health, Heidelberg, VIC 3084                                                                                                                                                                                                                                    | Prof.        | MBBS, PhD                     |
| Piero Perucca       | Department of Medicine, Austin Health, The University of Melbourne; Comprehensive Epilepsy Program, Austin Health; Department of Neuroscience, Central Clinical School, Monash University; Department of Neurology, The Royal Melbourne Hospital; Department of Neurology, Alfred Health, Melbourne, VIC, Australia | A/Prof       | MD, PhD, FRACP                |
| Lucy Vivash         | The Department of Neuroscience, The Central Clinical School, The Alfred Hospital, Monash University; and The Departments of Medicine and Neurology, The Royal Melbourne Hospital, The University of Melbourne, Victoria, Australia                                                                                  | Dr           | MSci, PhD                     |

|                    |                                                                                                                                                                                                                                    |           |           |
|--------------------|------------------------------------------------------------------------------------------------------------------------------------------------------------------------------------------------------------------------------------|-----------|-----------|
| Rashida Ali        | Alfred Health;<br>Monash University                                                                                                                                                                                                | Ms        | MSc       |
| Terence J. O'Brien | The Department of Neuroscience, The Central Clinical School, The Alfred Hospital, Monash University; and The Departments of Medicine and Neurology, The Royal Melbourne Hospital, The University of Melbourne, Victoria, Australia | Prof.     | MD, FRACP |
| Colin L Masters    | National Dementia Diagnostics Laboratory, The Florey Institute, University of Melbourne                                                                                                                                            |           | MD        |
| Steven Collins     | Australian National Creutzfeldt-Jakob Disease Registry, Florey Institute of Neuroscience and Mental Health and Department of Medicine, The University of Melbourne.                                                                | Professor | MD        |
| Wendy Kelso        | Neuropsychiatry, Royal Melbourne Hospital                                                                                                                                                                                          | Dr        |           |
| Andrew Evans       | Neuropsychiatry, Royal Melbourne Hospital                                                                                                                                                                                          | A/Prof    |           |
| Anna King          | The Wicking Dementia Centre, Tasmania                                                                                                                                                                                              | Professor |           |
| Patrick Kwan       | Alfred Hospital; Monash University, Melbourne                                                                                                                                                                                      | Professor |           |
| Jane Gunn          | Department of General Practice, The University of Melbourne                                                                                                                                                                        | Professor |           |
| Ilias Goranitis    | Health Economics Unit   Centre for Health Policy   Melbourne School of Population and Global Health, The University of Melbourne                                                                                                   | Dr        |           |
